# Supplementary material for: N-3 Polyunsaturated Fatty Acids Stimulate Bile Acid Detoxification in Human Cell Models
Source: Hindawi journal article supplement (doi:10.1155/2018/6031074), 2018-01-01
Supplement: f1 [file 6031074.f1.pdf]

**N-3 POLYUNSATURATED FATTY ACIDS STIMULATE BILE ACID DETOXIFICATION IN HUMAN  
CELL MODELS.**

**Anna Cieślak, Jocelyn Trottier, Mélanie Verreault, Piotr Milkiewicz, Marie-Claude Vohl and Olivier  
Barbier**

**SUPPLEMENTARY MATERIALS**

## LIST OF ABBREVIATIONS

|                |                                                                    |
|----------------|--------------------------------------------------------------------|
| ASBT,          | apical sodium-dependent bile acid transporter                      |
| BACAT,         | bile acid-Coenzyme A dehydrogenase: amino acid n-acyltransferase   |
| BACL,          | bile acid-CoA ligase                                               |
| BAs,           | bile acids                                                         |
| BSEP,          | bile salt export pump                                              |
| CA,            | cholic acid                                                        |
| Caco2,         | human epithelial colorectal adenocarcinoma cells                   |
| CDCA,          | chenodeoxycholic acid                                              |
| CYP,           | cytochrome P450                                                    |
| CYP27A1,       | sterol 27-hydroxylase                                              |
| CYP3A4,        | cytochrome P450 3A4                                                |
| CYP7A1,        | cholesterol 7 $\alpha$ -hydroxylase                                |
| CYP8B1,        | 12 $\alpha$ -hydroxylase                                           |
| DCA,           | deoxycholic acid                                                   |
| DHA,           | docosahexaenoic acid                                               |
| DMEM,          | Dulbecco's modified Eagle's medium                                 |
| DMEM/HAM-F-12, | Dulbecco's Modified Eagle's Medium and Ham's F-12 Nutrient Mixture |
| EPA,           | eicosapentaenoic acid                                              |
| FACS,          | fluorescence-activated cell sorting                                |
| FBS,           | fetal bovine serum                                                 |
| FGFR4,         | fibroblast growth factor receptor 4                                |
| FGF-19,        | fibroblast growth factor 19                                        |
| FXR,           | farnesoid X-receptor                                               |
| GBA,           | glyco-conjugated bile acid                                         |
| HCA,           | hyocholic acid                                                     |

|                      |                                                              |
|----------------------|--------------------------------------------------------------|
| HDCA,                | hyodeoxycholic acid                                          |
| HepG2,               | human hepatocellular liver carcinoma cells                   |
| HNF4 $\alpha$ ,      | hepatic nuclear factor-4                                     |
| I-BABP,              | intestinales bile acid-binding protein                       |
| InEpC,               | Intestinal Epithelial Cells                                  |
| KCA,                 | ketocholeic acid                                             |
| LCA,                 | lithocholic acid                                             |
| LCA-S,               | lithocholic acid sulfate                                     |
| LC-MS/MS,            | liquid chromatography-tandem mass spectrometry               |
| LRH-1,               | Liver receptor homologue-1                                   |
| LXR $\alpha$ ,       | liver X-receptor alpha                                       |
| MRP,                 | multi-drug resistance protein                                |
| NR,                  | nuclear receptor                                             |
| NTCP,                | Na <sup>+</sup> Taurocholate cotransporting polypeptide      |
| N-3 PUFAs,           | polyunsaturated fatty acids                                  |
| OATP,                | organic anion transporting polypeptide                       |
| OST $\alpha/\beta$ , | organic solute transporter alpha/beta                        |
| PBC,                 | primary biliary cholangitis                                  |
| PI,                  | propidium iodine                                             |
| PPAR $\alpha$ ,      | peroxisome proliferator-activated receptors alpha            |
| PSC,                 | primary sclerosing cholangitis                               |
| PUM-1,               | pumilio RNA-binding family member 1                          |
| PXR,                 | pregnane X-receptor                                          |
| qRT-PCR,             | quantitative reverse-transcription polymerase chain reaction |
| RPTEC,               | renal proximal tubule epithelial cells                       |

|       |                                             |
|-------|---------------------------------------------|
| RT,   | reverse transcription                       |
| RXR,  | retinoid X receptor                         |
| SHP,  | small heterodimer partner                   |
| SmGM, | smooth Muscle Growth SingleQuote Medium     |
| SULT, | sulfotransferase                            |
| TBA,  | tauro-conjugated bile acid                  |
| TGR5, | G-protein-coupled bile acid receptor Gpbar1 |
| UDCA, | ursodeoxycholic acid                        |

**Supplementary Table 1: Primers and conditions used for quantitative real-time PCR experiments.**

| Gene           | Primers                                                                    | Annealing Temperature (°C) | RT dilution                                              |
|----------------|----------------------------------------------------------------------------|----------------------------|----------------------------------------------------------|
| ASBT           | Sense: 5'-TGACCACATGCTCCACACTG<br>Antisense: 5'-CCCAGAGTCGACCCACATTT       | 62°C                       | Caco-2 1/50<br>InEpC 1/25<br>RPTEC 1/50                  |
| BACAT          | Sense: 5'-CTGCCAACTTTCTCCTGAGACA<br>Antisense: 5'-CCAATCTGTACTCCTTGACATACA | 60°C                       | HepG2 1/200                                              |
| BACL           | Sense: 5'-GTGGAGGGCGTGTGTCGCA<br>Antisense: 5'-CCGTGCGAAAGTCTGGCCGGG       | 62°C                       | HepG2 1/200                                              |
| BSEP           | Sense: 5'-GGGCCATTGTACGAGATCCTAA<br>Antisense: 5'-TGCACCGTCTTTTCACTTTCTG   | 61°C                       | HepG2 1/50                                               |
| CYP3A4         | Sense: 5'-CCAAGCTATGCTCTTCACCG<br>Antisense: 5'-TCAGGCTCCACTTACGGTGC       | 65°C                       | HepG2 1/50<br>RPTEC 1/50                                 |
| CYP27          | Sense: 5'-CGGCAACGGAGCTTAGAGG<br>Antisense: 5'-GGCATAGCCTTGAACGAACAG       | 60°C                       | HepG2 1/200                                              |
| CYP7A1         | Sense: 5'-AGAAGCATTGACCCGATGGAT<br>Antisense: 5'-AGCGGTCTTTGAGTTAGAGGA     | 59°C                       | HepG2 1/50                                               |
| CYP8B1         | Sense: 5'-GAAGCGCATGAGGACCAAG<br>Antisense: 5'-TTGCATATTGCCCAAAGTCTAGT     | 59°C                       | HepG2 1/50                                               |
| FGF19          | Sense: 5'-CGGAGGAAGACTGTGCTTTTCG<br>Antisense: 5'-CTCGGATCGGTACACATTGTAG   | 62°C                       | HepG2 1/50<br>Caco-2 1/200<br>InEpC 1/25<br>RPTEC 1/50   |
| FGFR4          | Sense: 5'-GAGGGGCCGCCTAGAGATT<br>Antisense: 5'-CAGGACGATCATGGAGCCT         | 62°C                       | HepG2 1/200<br>Caco-2 1/200<br>InEpC 1/25<br>RPTEC 1/50  |
| FXR            | Sense: 5'-GGTGTTTTAACAGAACAAGTGCC<br>Antisense: 5'-ACATTGCTGTATTGCGAGTATGG | 60°C                       | HepG2 1/200<br>Caco-2 1/50<br>InEpC 1/25<br>RPTEC 1/500  |
| HNF4 $\alpha$  | Sense: 5'-CGACACGTCCCCATCAGAAG<br>Antisense: 5'-CTCGAGGCACCGTAGTGTTT       | 60°C                       | HepG2 1/200<br>Caco-2 1/500<br>InEpC 1/50<br>RPTEC 1/100 |
| IBABP          | Sense: 5'-ACCGGCAAGTTCGAGATGG<br>Antisense: 5'-CCTTTTCGATTACATCGCTGGA      | 60°C                       | Caco-2 1/50<br>InEpC 1/25                                |
| $\beta$ KLOTHO | Sense: 5'-TTGCCAACGCAAAGGTCTG<br>Antisense: 5'-GCCAAAGGCAAATCCCAGTG        | 60°C                       | HepG2 1/500<br>Caco-2 1/500<br>InEpC 1/50<br>RPTEC 1/100 |
| LRH            | Sense: 5'-GAATGCGTGGAGGAAGGAATAA<br>Antisense: 5'-GTCAGAGGGCATAGCTTGGAT    | 60°C                       | HepG2 1/200<br>Caco-2 1/500<br>InEpC 1/50<br>RPTEC 1/50  |
| LXR $\alpha$   | Sense: 5'-GCTGCAAGTGAATTCATCAACC<br>Antisense: 5'-ATATGTGTGCTGCAGCCTCTCCA  | 64°C                       | HepG2 1/100<br>Caco-2 1/500<br>InEpC 1/50<br>RPTEC 1/50  |
| Gene           | Primers                                                                    | Annealing Temperature      | RT dilution                                              |

|               |                                                                               | (°C) |                                                           |
|---------------|-------------------------------------------------------------------------------|------|-----------------------------------------------------------|
| MRP2          | Sense: 5'-CAAACCTCTATCTTGCTAAGCAGG<br>Antisense: 5'-TGAGTACAAGGGCCAGCTCTA     | 59°C | HepG2 1/1000<br>Caco-2 1/1000<br>InEpC 1/50<br>RPTEC 1/50 |
| MRP3          | Sense: 5'-CAGAGAAGGTGCAGGTGACA<br>Antisense: 5'-CTAAAGCAGCATAGACGCCC          | 59°C | HepG2 1/200<br>Caco-2 1/50<br>InEpC 1/100<br>RPTEC 1/50   |
| MRP4          | Sense: 5'-GGACAAAGACAACCTGGTGTGCC<br>Antisense: 5'-AATGGTTAGCACGGTGCAGTGG     | 64°C | HepG2 1/200<br>Caco-2 1/1000<br>InEpC 1/50<br>RPTEC 1/500 |
| NTCP          | Sense: 5'-TGATATCACTGGTCCTGGTTCTCA<br>Antisense: 5'-GCATGTATTGTGGCCGTTTG      | 61°C | HepG2 1/50                                                |
| OATP1B1       | Sense: 5'-TGGTCCACCAACAACCTGTGGCA<br>Antisense: 5'-AGACAAGCCCAAGTAGACCCCTTGAA | 60°C | HepG2 1/50                                                |
| OATP1B3       | Sense: 5'-AAGTTGTGCTTTGCGATGCTGAGT<br>Antisense: 5'-GTCAGGCCCTCTAGGAGGTGGG    | 62°C | HepG2 1/50                                                |
| OST $\alpha$  | Sense: 5'-AGATTGCTTGTTCGCCTCC<br>Antisense: 5'-ATTCGTGTCAGCACAGTCATTAG        | 59°C | HepG2 1/50<br>Caco-2 1/50<br>InEpC 1/50<br>RPTEC 1/50     |
| OST $\beta$   | Sense: 5'-CAGGAGCTGCTGGAAGAGAT<br>Antisense: 5'-GACCATGCTTATAATGACCACCA       | 59°C | HepG2 1/50<br>Caco-2 1/50<br>InEpC 1/50<br>RPTEC 1/50     |
| PPAR $\alpha$ | Sense: 5'-ATATCTCCCTTTTTGTGGCTGCTA<br>Antisense: 5'-TCCGACTCCGTCTTCTTGATGA    | 60°C | HepG2 1/200<br>Caco-2 1/100<br>InEpC 1/50<br>RPTEC 1/100  |
| PUM1          | Sense: 5'-CCGTCCGAAAGTCTGGCCGGG<br>Antisense: 5'-CATTAAATTACCTGCTGGTCTGAAGGA  | 62°C | All cells: 1/50                                           |
| PXR           | Sense: 5'-GACAGTGCCAGGCCTGCCGCC<br>Antisense: 5'-CATCTGAGCGTCCATCAGCTCC       | 62°C | HepG2 1/100<br>Caco-2 1/100<br>InEpC 1/50<br>RPTEC 1/50   |
| RXR           | Sense: 5'-ATGGACACCAAACATTTCTCTGC<br>Antisense: 5'-GGGAGCTGATGACCGAGAAAG      | 62°C | HepG2 1/100<br>Caco-2 1/200<br>InEpC 1/50<br>RPTEC 1/200  |
| SHP           | Sense: 5'-GTGCCCAGCATACTCAAGAAG<br>Antisense: 5'-TGGGGTCTGTCTGGCAGTT          | 60°C | HepG2 1/1000<br>Caco-2 1/50<br>InEpC 1/25<br>RPTEC 1/50   |
| SULT2A1       | Sense: 5'-ACGGATTTCGAGGCCACGTCC<br>Antisense: 5'-TCCGTTTCACTGAGTGCTGTA        | 62°C | HepG2 1/200<br>Caco-2 1/500<br>InEpC 1/50<br>RPTEC 1/200  |
| TGR5          | Sense: 5'-GACTTTGGACCATGAAGACCAG<br>Antisense: 5'-GCCCAGACGGAAGTTTCTTATT      | 60°C | HepG2 1/50<br>Caco-2 1/50<br>InEpC 1/25<br>RPTEC 1/200    |

### SUPPLEMENTARY FIGURE LEGENDS

**Supplementary Figure 1. Dose-dependent and gene-specific modulation of the bile acid-related transcriptome in human hepatoma HepG2 cells treated with EPA and DHA.**

HepG2 cells were treated with DMSO (vehicle, 0.1% v/v) or DHA or EPA for 24H at 5, 15, 25 and 50  $\mu$ M for mRNA measurements. Total RNA was extracted using the TriReagent® protocol to further measure mRNA levels by quantitative real time PCR as detailed in the materials and methods section.

Each data point represents the mean $\pm$ S.D. of triplicate experiments. The results are representative of two independent experiments. Statistically significant differences were analyzed using one-way analysis of variance (ANOVA) (\*  $p < 0.05$ ).

**Supplementary Figure 2. Time-dependent and gene-specific modulation of the bile acid-related transcriptome in human HepG2 cells treated with EPA and DHA.**

HepG2 cells were treated with DMSO (vehicle, 0.1% v/v) or DHA or EPA at 50  $\mu$ M for 6, 12, 18, 24 and 48H for mRNA measurements. Total RNA was extracted using the TriReagent® protocol to further measure mRNA levels by quantitative real time PCR as detailed in the materials and methods section.

Each data point represents the mean $\pm$ S.D. of triplicate experiments. The results are representative of two independent experiments. Statistically significant differences were analyzed using one-way analysis of variance (ANOVA) (\*  $p < 0.05$ ).

**Supplementary Figure 3. Additive and/or synergistic effects of the EPA+DHA combination on the bile acid-related transcriptome in human hepatoma HepG2 cells.**

HepG2 cells were treated with DMSO (vehicle, 0.1% v/v) or DHA and/or EPA for 24H at 25 and/or 50  $\mu$ M for mRNA measurements. Total RNA was extracted using the TriReagent® protocol to further measure mRNA levels by quantitative real time PCR as detailed in the materials and methods section.

Each data point represents the mean $\pm$ S.D. of triplicate experiments. The results are representative of two independent experiments. Statistically significant differences were analyzed using one-way analysis of variance (ANOVA) (\*  $p < 0.05$ ).

**Supplementary Figure 4. Preparation of the PUFA solution has minimum impact on the response of BA-related genes in HepG2 cells.**

HepG2 cells were exposed to EPA/DHA (25/25 or 50/50 $\mu$ M) prepared either in DMSO or in culture medium containing 125 $\mu$ M BSA for 24H. Total RNA was extracted using the TriReagent® protocol and CYP7A1, CYP27 and MRP3 mRNA levels were determined by quantitative real time PCR as detailed in the materials and methods section.

Statistically significant differences were analyzed using one-way analysis of variance (ANOVA) (\*  $p < 0.05$ ).

**Supplementary Figure 5. Time-dependent effects of n-3 PUFAs on the bile acid-induced activation of the pro-apoptotic Caspase 3 pathway in human hepatoma HepG2 cells.**

HepG2 cells pretreated with DMSO (vehicle, 0.1% v/v) and DHA/EPA (50/50 $\mu$ M) (**A**): for 24H and exposed to 100  $\mu$ M BAs (CA, CDCA, LCA, CDA) for 0,5, 1, 2, 3, 6 and 24H, (**B**): for 3, 6, 16 and 24H and exposed to 100  $\mu$ M BA (CA, CDCA, LCA, CDA) for 2H. The caspase-3 activity was determined as indicated in the materials and methods section.

The results (mean $\pm$ S.D.) are representative of two independent experiments. Statistical differences between two groups were analyzed using unpaired two-side *t*-test *versus* vehicle (\*) or BAs ( $\pm$ ) ( $p < 0.05$ ).

**Supplementary Figure 6. Dose-dependent and additive/synergistic effects of EPA and/or DHA on the bile acid-related transcriptome in human colon carcinoma Caco-2 cells.**

Human colon carcinoma Caco-2 were treated with DMSO (vehicle, 0.1% v/v) or DHA and/or EPA for 24H at 10, 25 and/or 50 $\mu$ M for mRNA measurements. Total RNA was extracted using the TriReagent® protocol to further measure mRNA levels by quantitative real time PCR as detailed in the materials and methods section.



Each data point represents the mean±S.D. of triplicate experiments. The results are representative of two independent experiments. Statistically significant differences were analyzed using one-way analysis of variance (ANOVA) (\*  $p < 0.05$ ).

**Supplementary Figure 7. Time-dependent and gene-specific modulation of the bile acid-related transcriptome in colon carcinoma Caco-2 cells treated with EPA and DHA.**

Human colon carcinoma Caco-2 were treated with DMSO (vehicle, 0.1% v/v) or DHA and EPA at 50 and 25µM respectively for 6, 12, 18, 24 and 48H for mRNA measurements. Total RNA was extracted using the TriReagent® protocol to further measure mRNA levels by quantitative real time PCR as detailed in the materials and methods section.

Each data point represents the mean±S.D. of triplicate experiments. The results are representative of two independent experiments. Statistical differences between two groups were analyzed using unpaired two-side *t*-test ( $p < 0.05$ ).

**Supplementary Figure 8. Time-dependent and gene-specific modulation of the bile acid-related transcriptome in RPTEC treated with EPA and DHA.**

Human renal proximal tubule epithelial cells (RPTEC) were treated with DMSO (vehicle, 0.1% v/v) or DHA and EPA at 25 and 50µM, respectively for 6, 12, 18, 24 and 48H for mRNA measurements. Total RNA was extracted using the TriReagent® protocol to further measure mRNA levels by quantitative real time PCR as detailed in the materials and methods section.

Each data point represents the mean±S.D. of triplicate experiments. The results are representative of two independent experiments. Statistical differences between two groups were analyzed using unpaired two-side *t*-test ( $p < 0.05$ ).

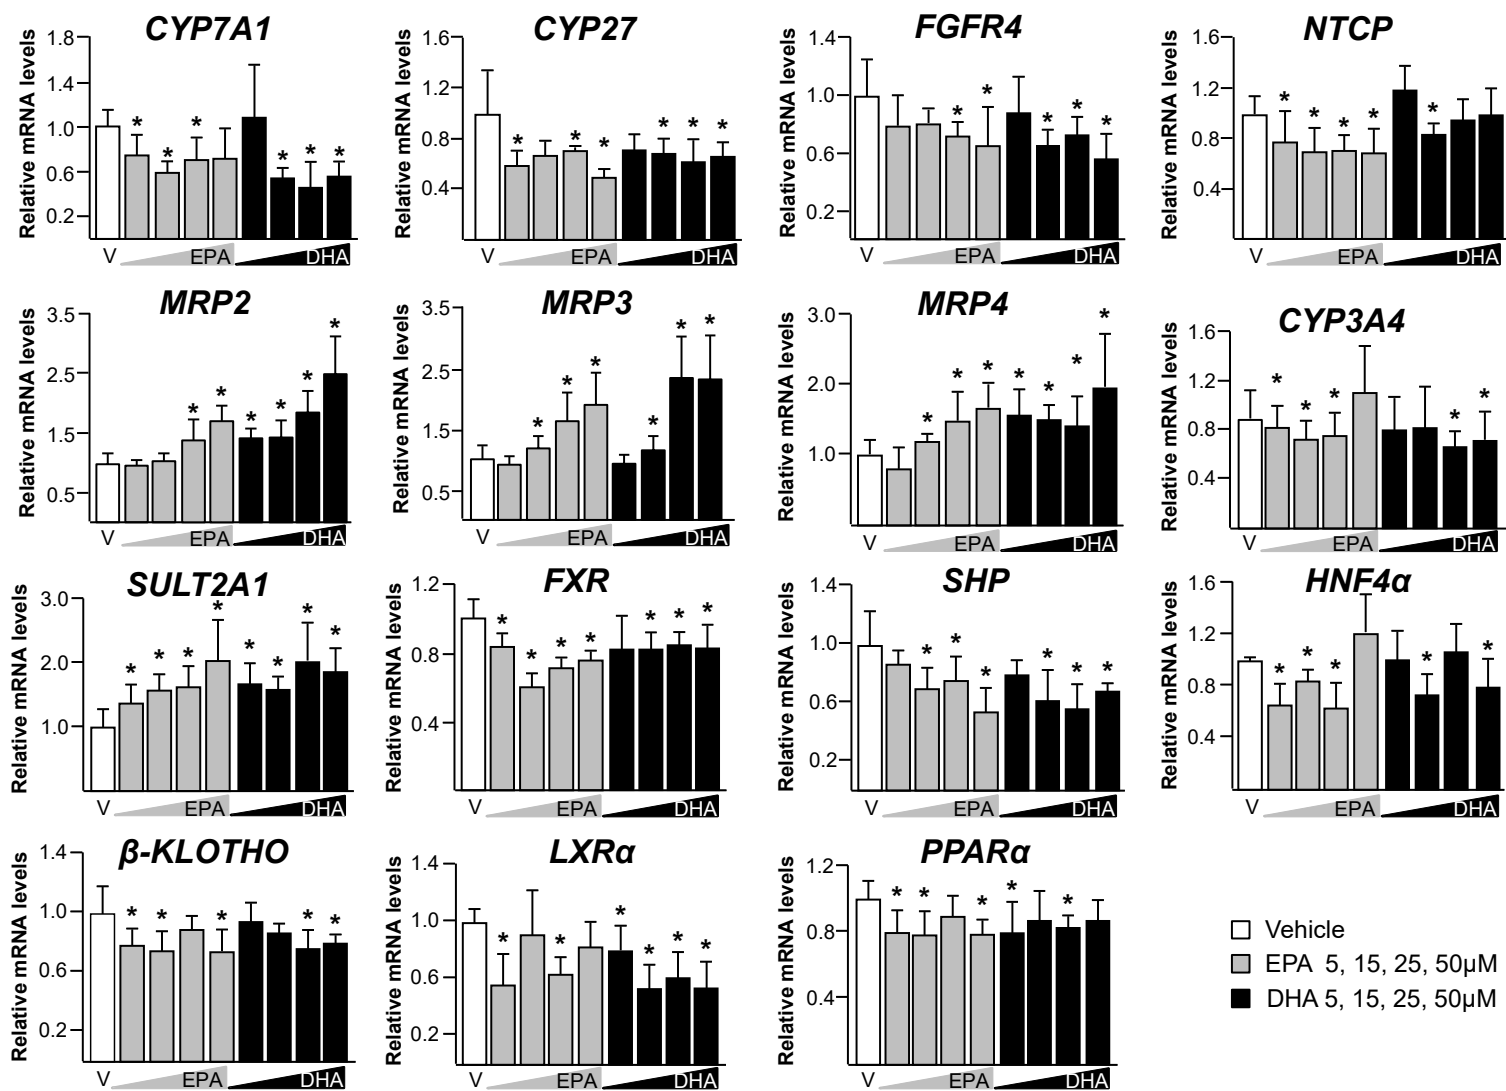

Supplementary Figure 1

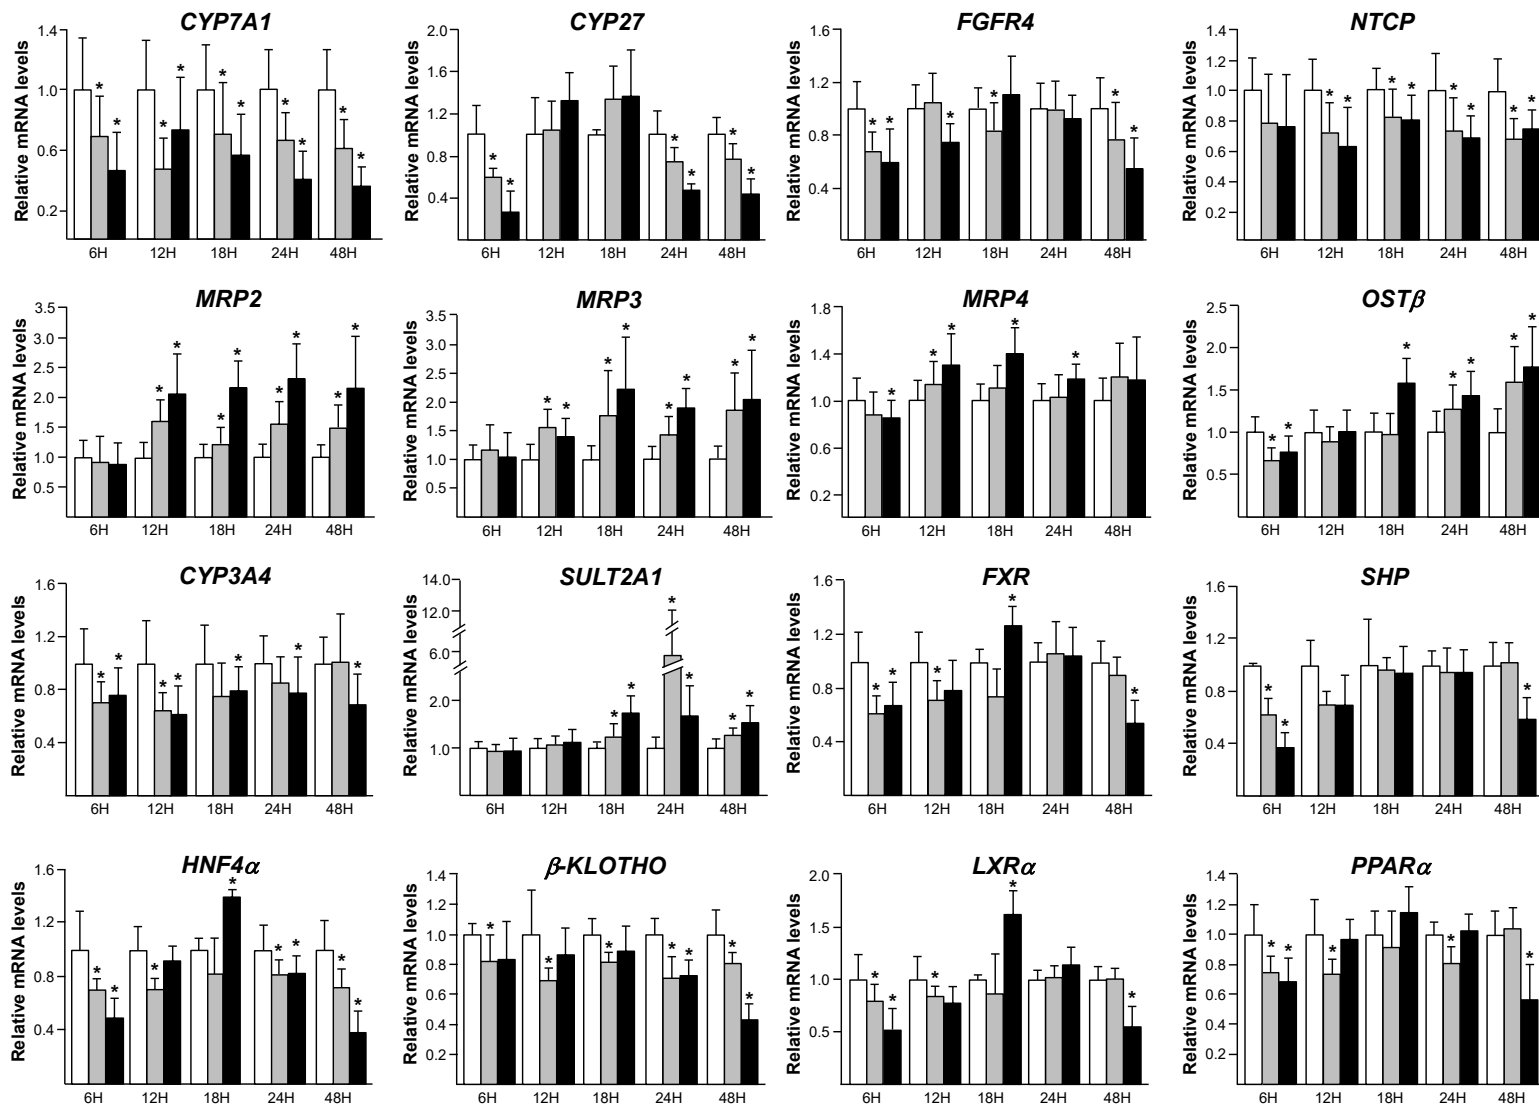

Supplementary Figure 2

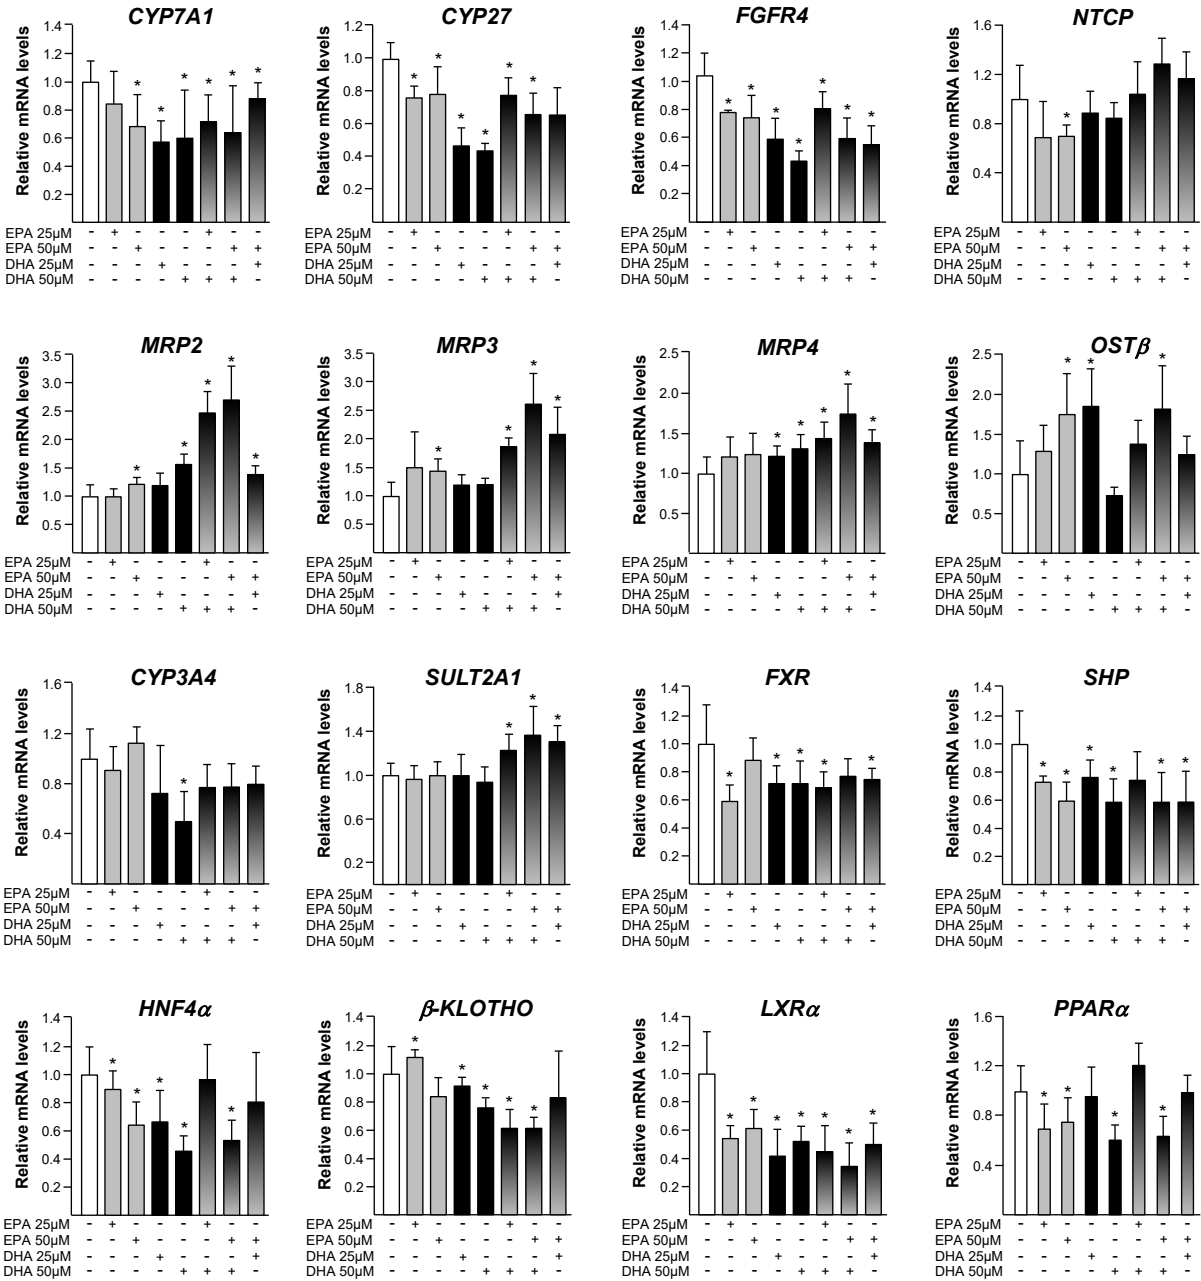

Supplementary Figure 3

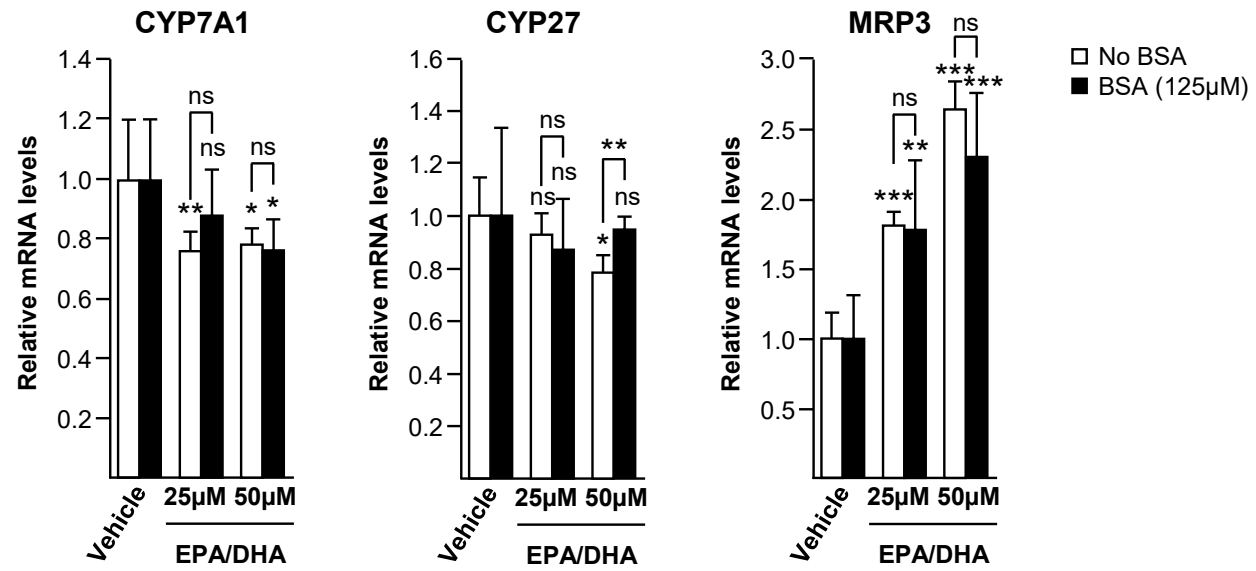

Supplementary Figure 4

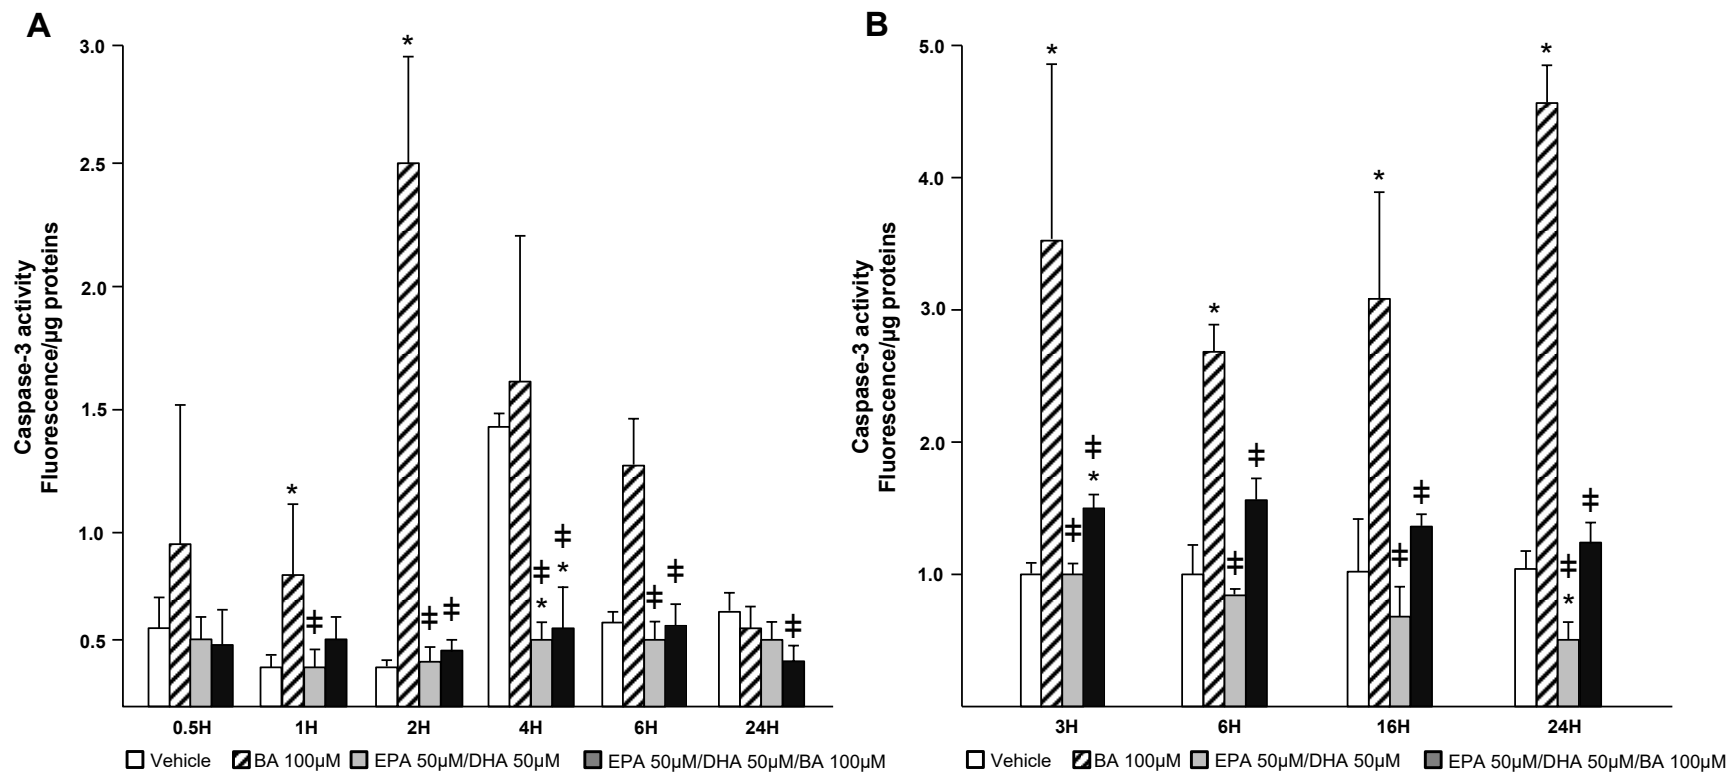

Supplementary Figure 5

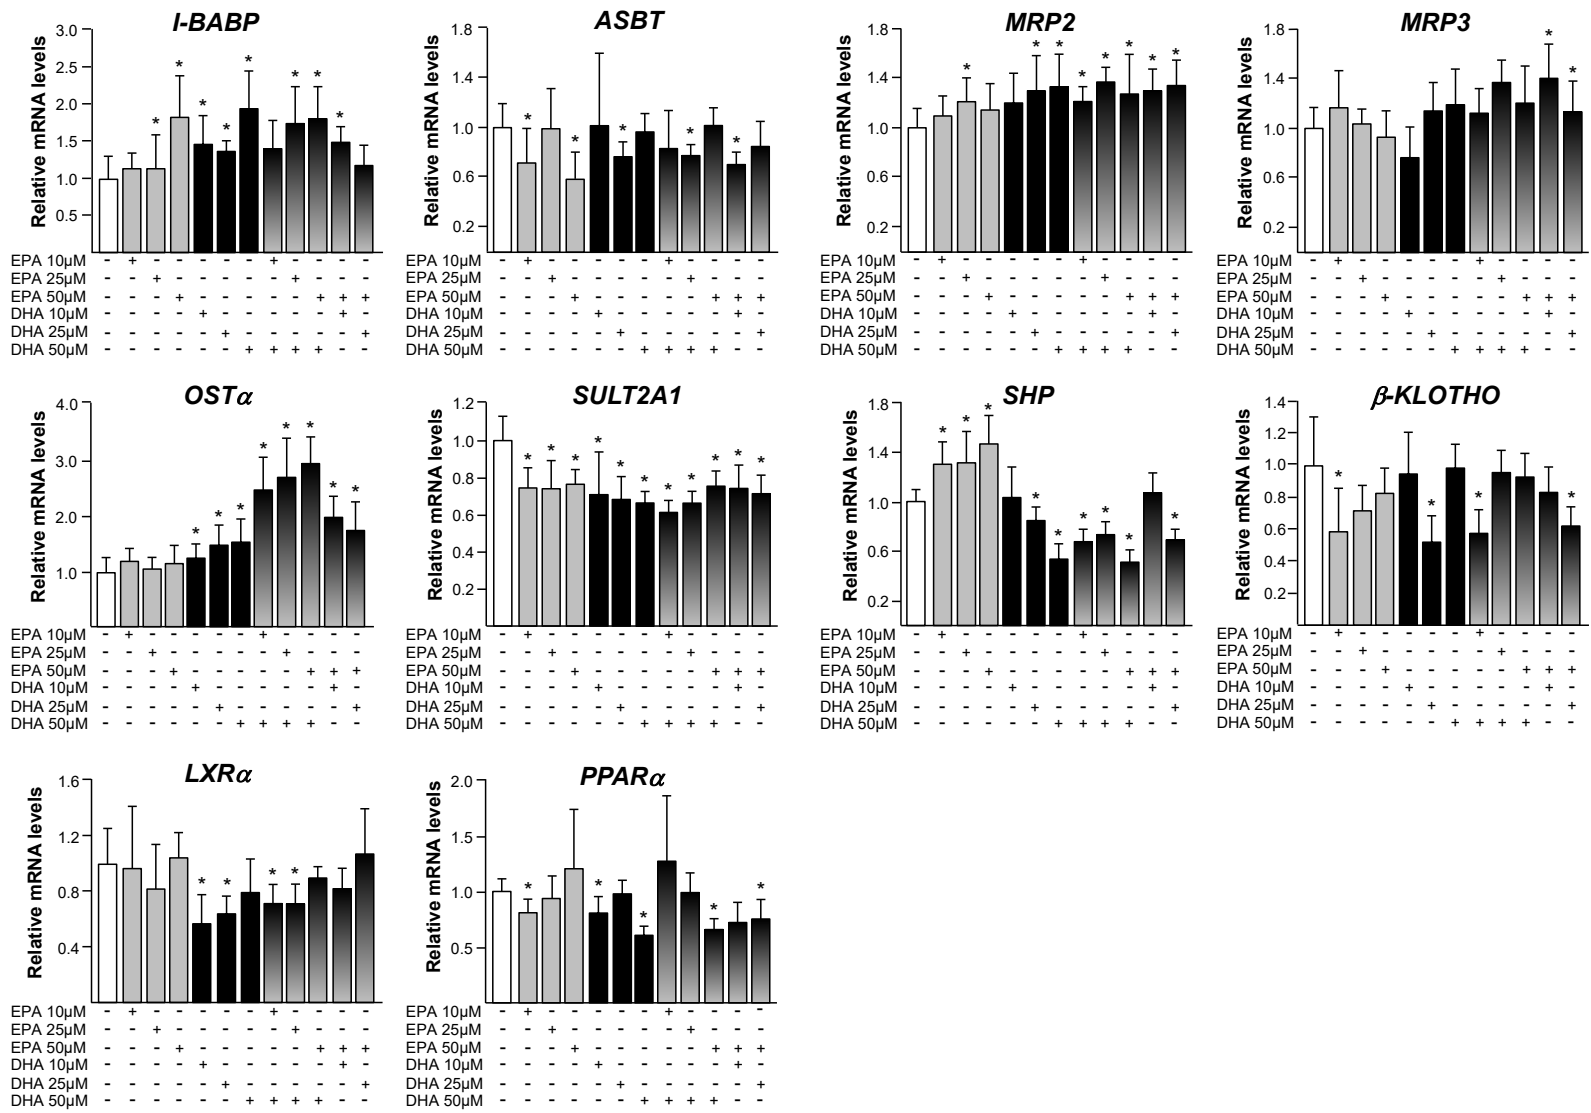

Supplementary Figure 6

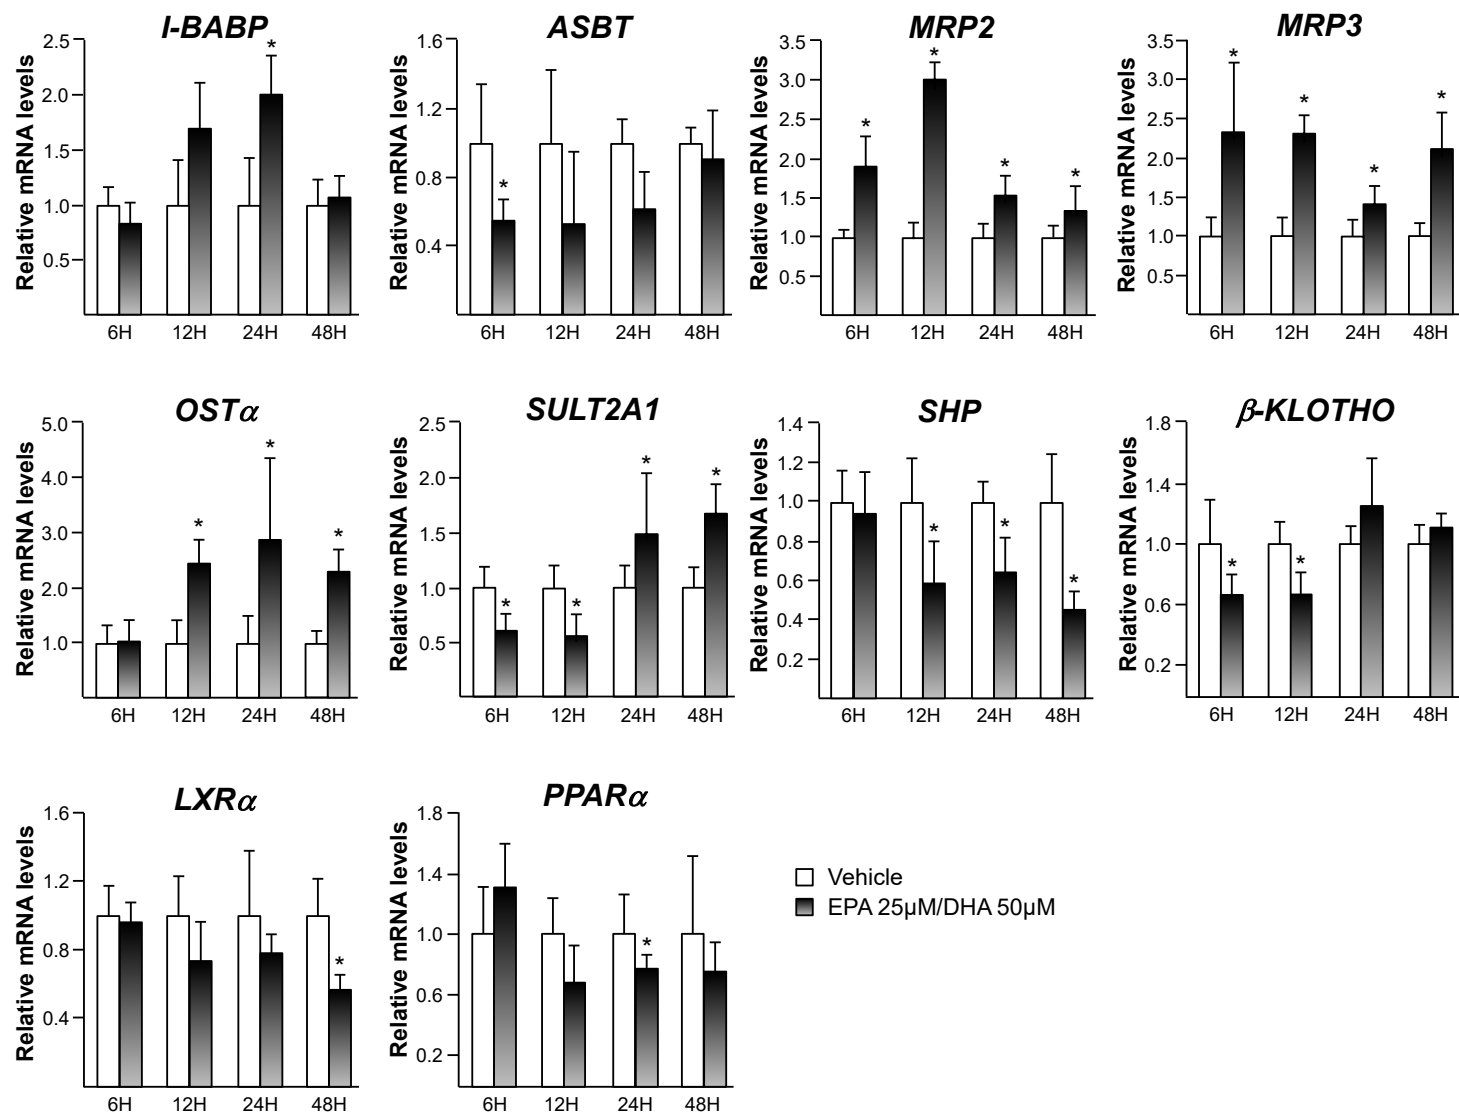

Supplementary Figure 7



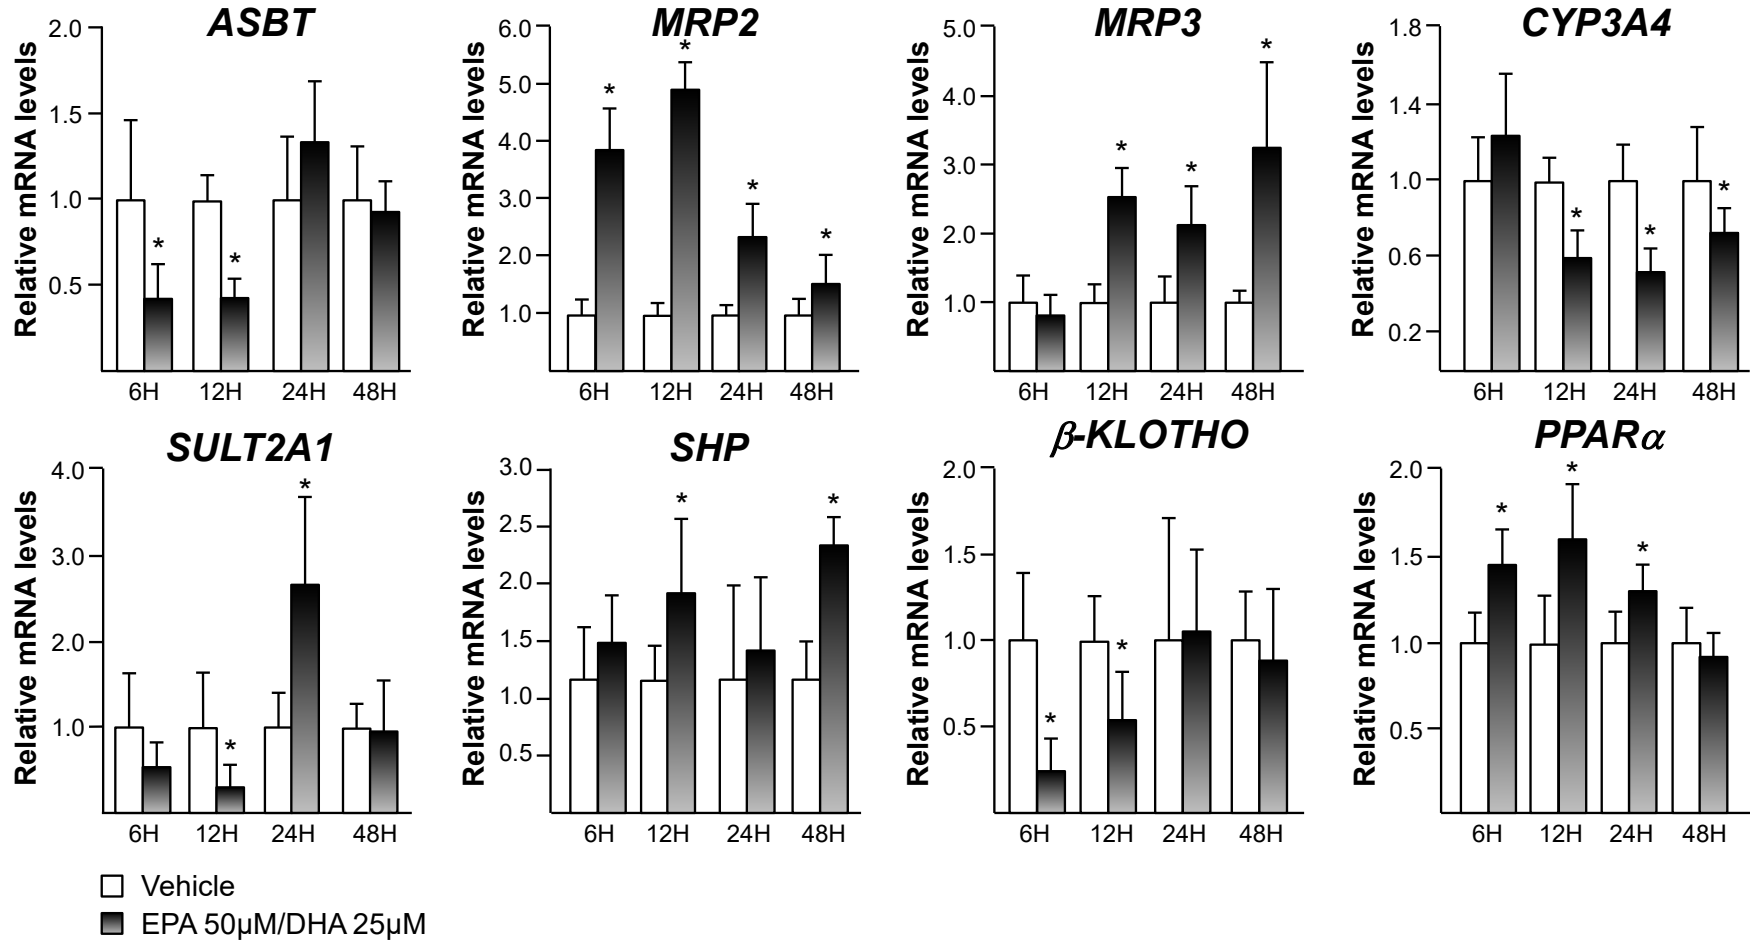

Supplementary Figure 8
